# Supplementary material for: Synergistic effect of two hydrochlorides resulting in significantly enhanced performance of tin-based perovskite solar cells with 3D to quasi-2D structural transition
Source: Royal Society of Chemistry journal article supplement (doi:10.1039/d2ta02088b), 2022-01-01
Supplement: d2ta02088b1.pdf [file d2ta02088b1.pdf]

**Supplementary Information**  
**For Journal of Materials Chemistry A**

**Synergistic Effect of Two Hydrochlorides Boosting 3D to  
Quasi-2D Tin-Based Perovskite Solar Cells with  
Significantly Enhanced Performance**

Tianhao Li<sup>a#</sup>, Yangyang Wang<sup>a#</sup>, Weiya Zhu<sup>b</sup>, Qianxi Dang<sup>a</sup>, Yiheng Zhang<sup>b</sup>, Yuan  
Li<sup>b\*</sup> and Xianyu Deng<sup>a\*</sup>

<sup>a</sup> Shenzhen Key Laboratory of Advanced Materials, School of Materials Science and Engineering, Harbin Institute of Technology, Shenzhen, China.

Email: xydeng@hit.edu.cn

<sup>b</sup> State Key Laboratory of Luminescent Materials and Devices, Institute of Polymer Optoelectronic Materials and Devices, South China University of Technology, 381, Wushan Road, Guangzhou, 510641, China.

E-mail: celiy@scut.edu.cn

<sup>#</sup> T.L. and W. Y.Y. contributed equally to this work.

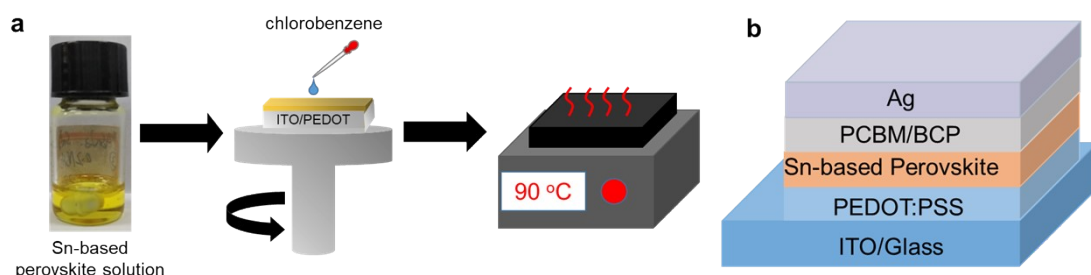

**Fig. S1.** (a) The progress of the Sn-based perovskite film via a one-step spin-coating method with antisolvent dripping. (b) Device structure of the 2D Sn-based PVSCs.

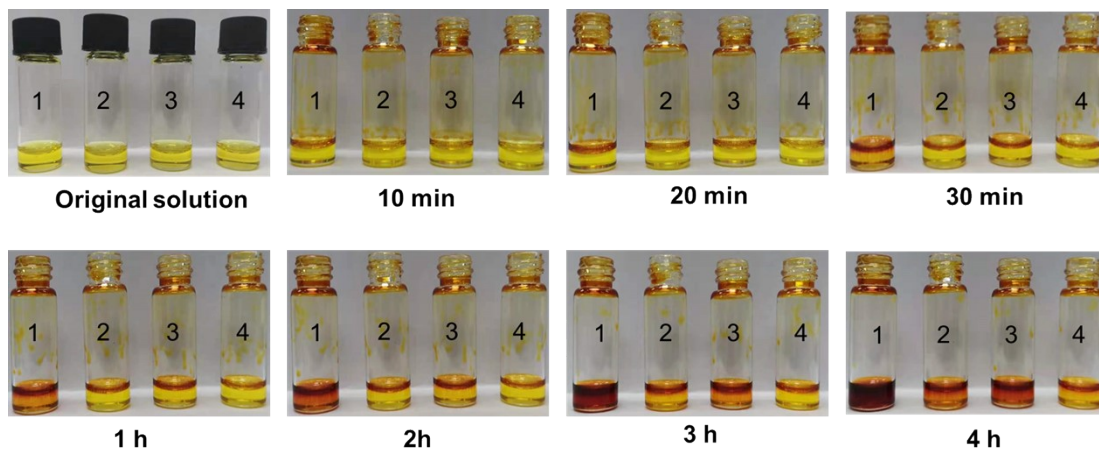

**Fig. S2.** Image of the precursor solution with different additives exposed in air for different time (the solution on the bottle wall can be considered as a mark to prove that the bottle has not moved during the shooting). The solution were marked as Sample 1: control solution; Sample 2: solution with DEACl; Sample 3: solution with HMCl; Sample 4: solution with HMCl and DEACl.

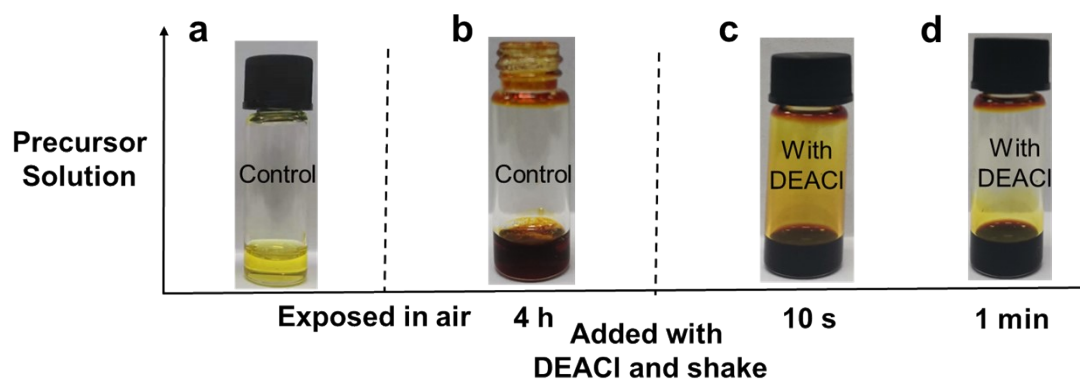

**Fig. S3.** Images of FASnI<sub>3</sub> solution. (a) FASnI<sub>3</sub> solution added with SnF<sub>2</sub>. (b) solution exposed in air for 4 h. Add DEACl to the oxidized precursor solution and shake for (c) 10 s and (d) 1 min.

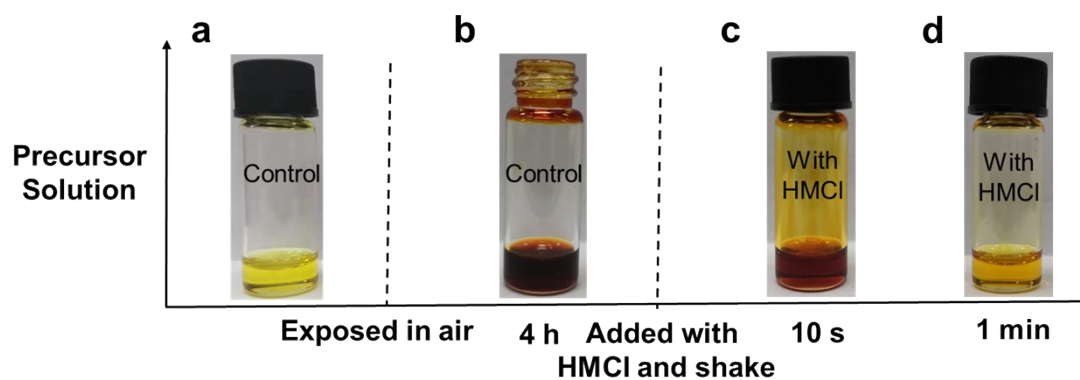

**Fig. S4.** Images of FASnI<sub>3</sub> solution. (a) The FASnI<sub>3</sub> solution added with SnF<sub>2</sub>. (b) The solution exposed in air for 4 h. The oxidized precursor solution after adding HMCl and shaking for (c) 10 s and (d) 1 min.

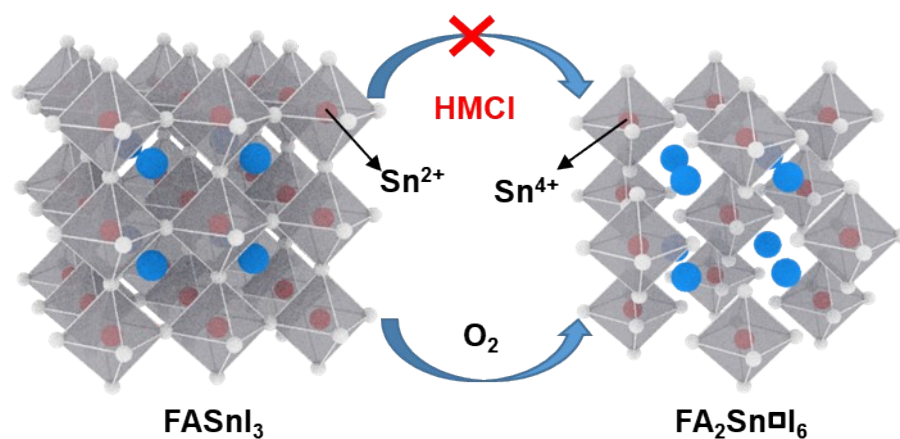

**Fig. S5.** 3D schematic diagram of the transformation of  $\text{FASnI}_3$  crystal in air environment.

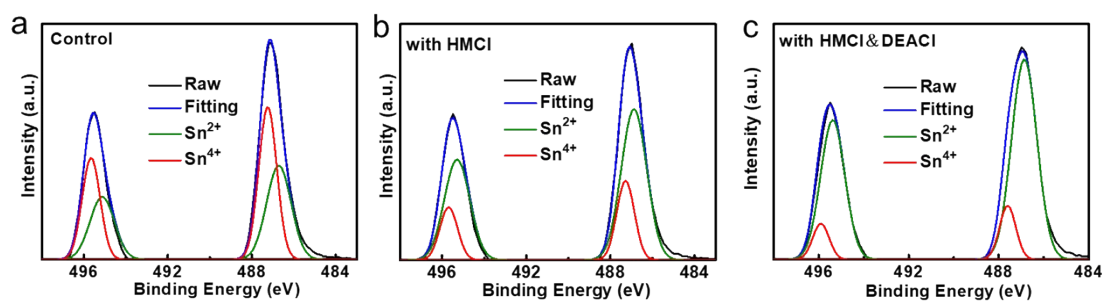

**Fig. S6.** XPS Sn 3d spectra of corresponding films (a) without additives, (b) with addition of 20% HMCI, and (c) with addition of 20% HMCI and 20% DEACI. The two peaks deconvoluted from the measured spectra at 486.5 and 487.5 eV are associated with  $\text{Sn}^{2+}$  and  $\text{Sn}^{4+}$ , respectively. The etching time is 30 s.

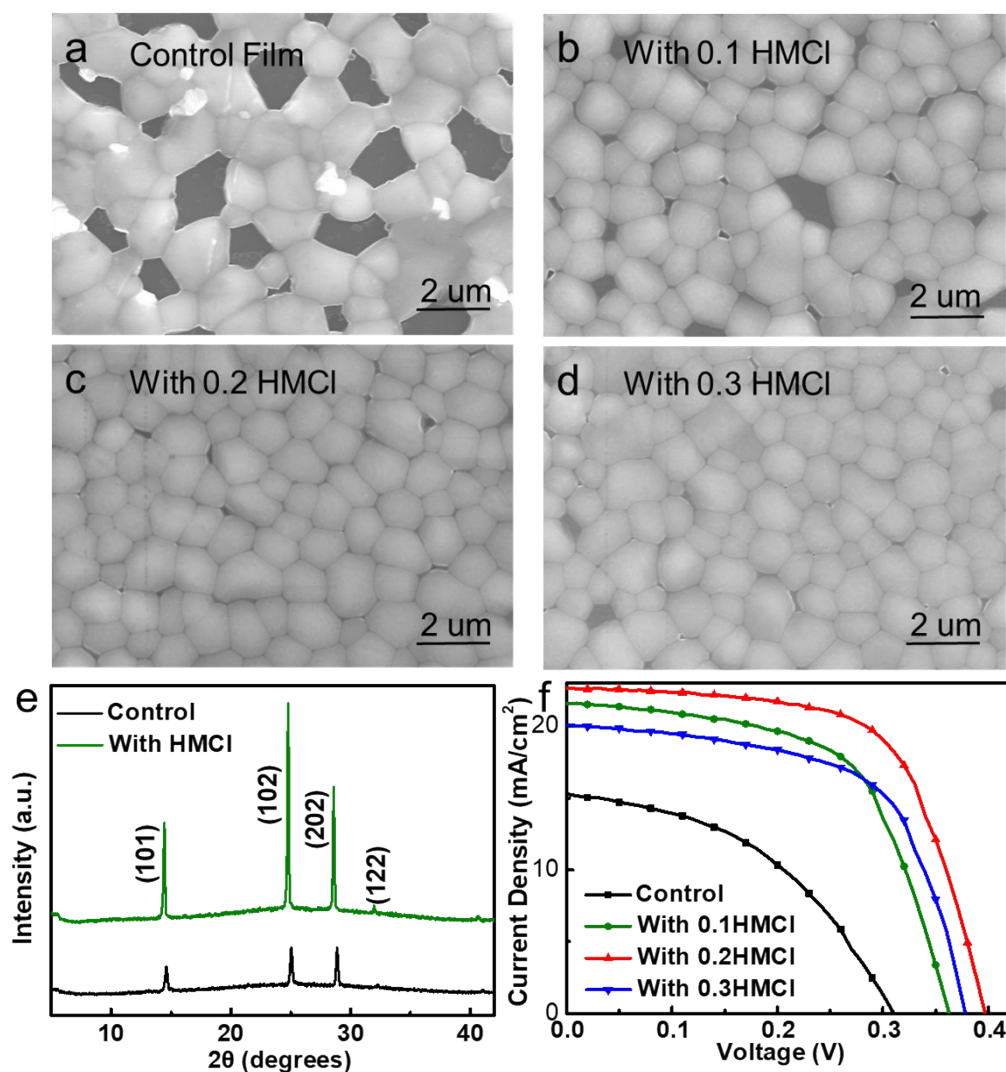

**Fig. S7.** SEM images of the Sn-based perovskite films with different amounts of HMCl. (a) without HMCl. (b) with 10% HMCl added. (c) with 20% HMCl added. (d) with 30% HMCl added. (e) XRD patterns of the Sn-based films, the control film (FASnI<sub>3</sub> film with 0.1M SnF<sub>2</sub>), and the film with 0.2M HMCl added. (f)  $J-V$  curves of Sn-based devices containing different amounts of HMCl.

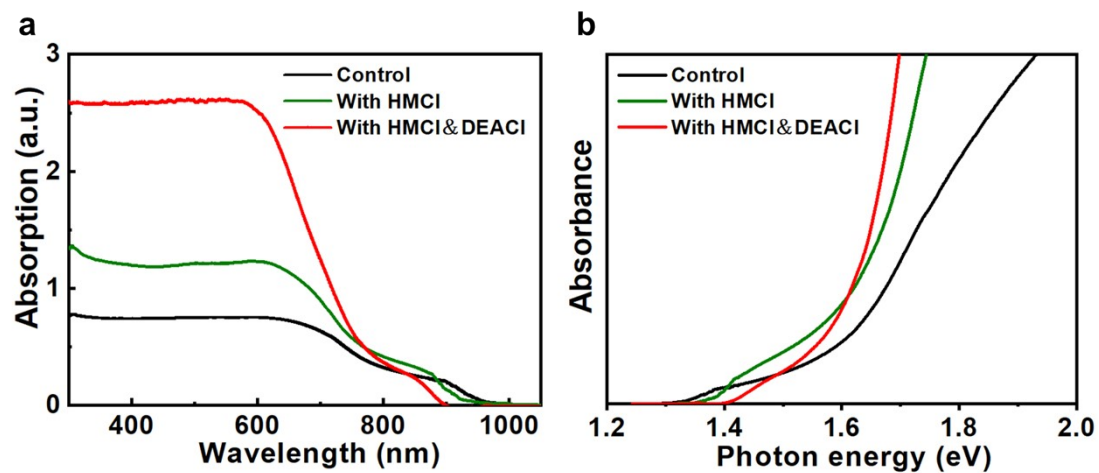

**Fig. S8.** (a) Absorption spectrum of the different films. (b) Tauc plot of Sn-based perovskite films with different additive (Photo energy are 1.33eV, 1.36 eV, 1.42 eV, respectively).

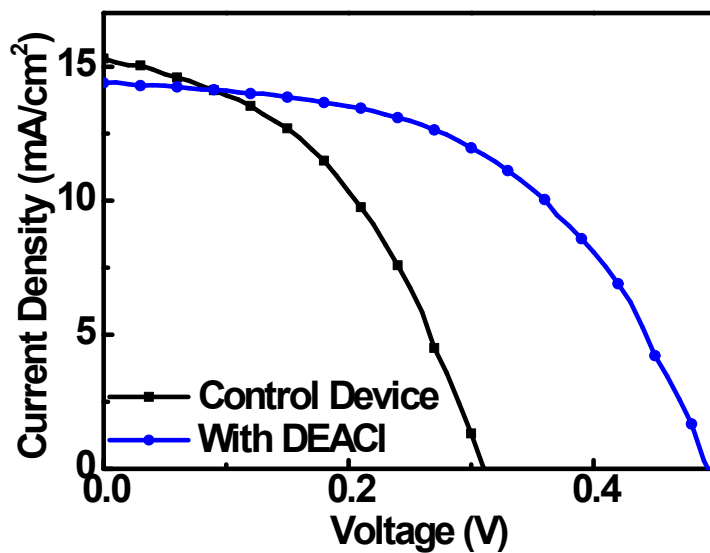

**Fig. S9.** *J-V* curves of Sn-based devices with and without DEACl.

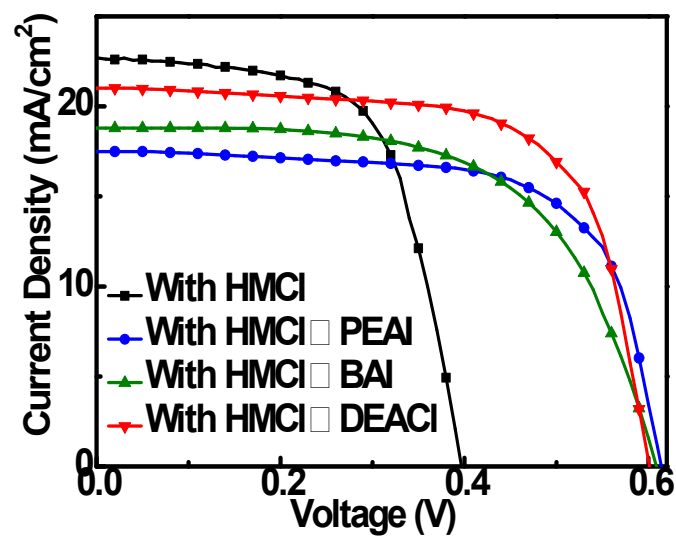

**Fig. S10.**  $J$ - $V$  curves of Sn-based devices containing HMCI with different large cations additive.

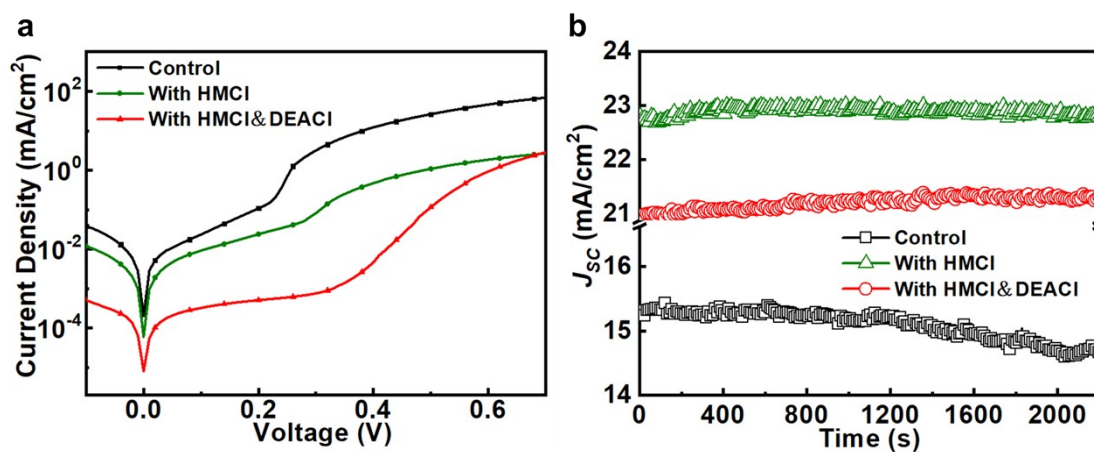

**Fig. S11.** (a) Dark  $J$ - $V$  curves of the control, with addition of HMCI, and with addition of HMCI and DEACI devices (b)  $J_{sc}$ - $T$  curves of the device with different additives under 1.5 G irradiation.

**Table S1.** The development of 2D tin-based perovskites in recent years

| Year | Structure                 | Author                 | Journal                   | PCE (%) |
|------|---------------------------|------------------------|---------------------------|---------|
| 2017 | 2D based BA <sup>+</sup>  | Mercouri G. Kanatzidis | <i>ACS Energy Lett.</i>   | 2.37    |
| 2017 | 2D based PEA <sup>+</sup> | Zhijun Ning            | <i>JACS</i>               | 5.94    |
| 2018 | 2D-3D hybrid              | Maria Antonietta Loi   | <i>Adv. Energy Mater.</i> | 9       |
| 2018 | 2D-3D hybrid              | Zhijun Ning            | <i>Joule</i>              | 9.41    |
| 2019 | 2D based AVA <sup>+</sup> | Mingjian Yuan          | <i>Adv. Funct. Mater.</i> | 8.71    |
| 2020 | 2D based BA <sup>+</sup>  | Mingzhen Liu           | <i>ACS Energy Lett.</i>   | 4.04    |
| 2021 | 3D                        | Zhijun Ning            | <i>J. Am. Chem. Soc</i>   | 14.6    |
| 2021 | 2D-3D                     | Zhubing He             | <i>Adv. Mater.</i>        | 14.8    |
| 2022 | 2D based DEA <sup>+</sup> | This work              | --                        | 9.47    |

**Table S2.** Device parameters of Sn-based perovskite films adding with different content HMCl.

| Sample   | $J_{SC}$ (mA/cm <sup>2</sup> ) | $V_{OC}$ (V) | FF (%) | PCE (%) |
|----------|--------------------------------|--------------|--------|---------|
| Control  | 15.3                           | 0.31         | 48.28  | 2.29    |
| 10% HMCl | 21.6                           | 0.362        | 62.02  | 4.85    |
| 20% HMCl | 22.7                           | 0.396        | 66.22  | 5.95    |
| 30% HMCl | 20.11                          | 0.378        | 61.30  | 4.66    |

**Table S3.** Fitted TRPL parameters of Sn-based perovskite film with different additives.

| Sample          | $\tau_1$ (ns) | $\tau_2$ (ns) |
|-----------------|---------------|---------------|
| Control         | 2.14          | 7.43          |
| With HMCl       | 5.21          | 9.67          |
| With HMCl&DEACl | 7.92          | 16.32         |

**Table S4.** Device parameters of Sn-based perovskite solar cells with and without adding DEACl.

| Sample     | $J_{SC}$ (mA/cm <sup>2</sup> ) | $V_{OC}$ (V) | FF (%) | PCE (%) |
|------------|--------------------------------|--------------|--------|---------|
| Control    | 15.3                           | 0.31         | 48.28  | 2.29    |
| With DEACl | 14.39                          | 0.493        | 51.71  | 3.67    |

**Table S5.** The corresponding parameters of trap concentration and carrier mobility of perovskite films with different additives.

| Sample            | $V_{TFL}$ (V) | $N_{trap}$ (cm <sup>-3</sup> ) | $\mu$ (cm <sup>2</sup> V <sup>-1</sup> S <sup>-1</sup> ) |
|-------------------|---------------|--------------------------------|----------------------------------------------------------|
| Control Film      | 0.321         | $6.44 \times 10^{15}$          | $1.2524 \times 10^{-4}$                                  |
| With HMCl         | 0.0912        | $1.242 \times 10^{15}$         | $1.0043 \times 10^{-3}$                                  |
| With HMCl & DEACl | 0.0644        | $1.126 \times 10^{15}$         | $4.4581 \times 10^{-3}$                                  |

**Table S6.** The electrostatic potential (ESP) parameters of DEA<sup>+</sup>, BA<sup>+</sup> and PEA<sup>+</sup> calculated by density functional theory (EFT).

| Sample           | MPI (eV) | Volume (Å) | Minima ESP (eV) | Maxima ESP (eV) |
|------------------|----------|------------|-----------------|-----------------|
| DEA <sup>+</sup> | 4.61911  | 123.61614  | 3.571654        | 6.511710        |
| BA <sup>+</sup>  | 4.46498  | 123.81487  | 2.477844        | 6.933499        |
| PEA <sup>+</sup> | 3.86253  | 173.53287  | 1.907838        | 6.851608        |
